# Supplementary material for: p53 isoform Δ133p53 promotes efficiency of induced pluripotent stem cells and ensures genomic integrity during reprogramming
Source: PubMed Central journal article supplement (PMC5118801; doi:10.1038/srep37281), 2016-11-22
Supplement: srep37281-s1.pdf [file srep37281-s1.pdf]

**p53 isoform  $\Delta$ 133p53 promotes efficiency of induced pluripotent stem cells and ensures genomic integrity during reprogramming**

Lu Gong<sup>1,4†</sup>, Xiao Pan<sup>1†</sup>, Haide Chen<sup>2</sup>, Lingjun Rao<sup>2</sup>, Yelin Zeng<sup>2</sup>, Honghui Hang<sup>3</sup>, Jinrong Peng<sup>2\*</sup>, Lei Xiao<sup>2\*</sup>, Jun Chen<sup>1\*</sup>

<sup>1</sup> Key laboratory for Molecular Animal Nutrition, Ministry of Education, Innovation Center for Signaling Network, College of Life Sciences, Zhejiang University, Hangzhou 310058, China

<sup>2</sup>College of Animal Sciences, Zhejiang University, Hangzhou 310058, China

<sup>3</sup> Key Laboratory of Freshwater Fish Reproduction and Development, Ministry of Education, State Key Laboratory Breeding Base of Eco-Environments and Bio-Resources of the Three Gorges Reservoir Region, School of Life Sciences, Southwest University, 2 Tiansheng Road, Beibei, Chongqing, China 400715.

<sup>4</sup>Department of Genetics and Complex Diseases, Harvard School of Public Health, Boston, Massachusetts 02115, USA

Author Information: The authors declare no competing financial interest.

\*Correspondence to: Jun Chen, Tel/Fax: 86-571-88982101, E-mail: [chenjun2009@zju.edu.cn](mailto:chenjun2009@zju.edu.cn);

Lei Xiao, Email: [leixiao@zju.edu.cn](mailto:leixiao@zju.edu.cn); Jinrong Peng, Email: [pengjr@zju.edu.cn](mailto:pengjr@zju.edu.cn).

†These two authors contributed equally

# **SUPPLEMENTARY INFORMATION**

## Supplementary Figures

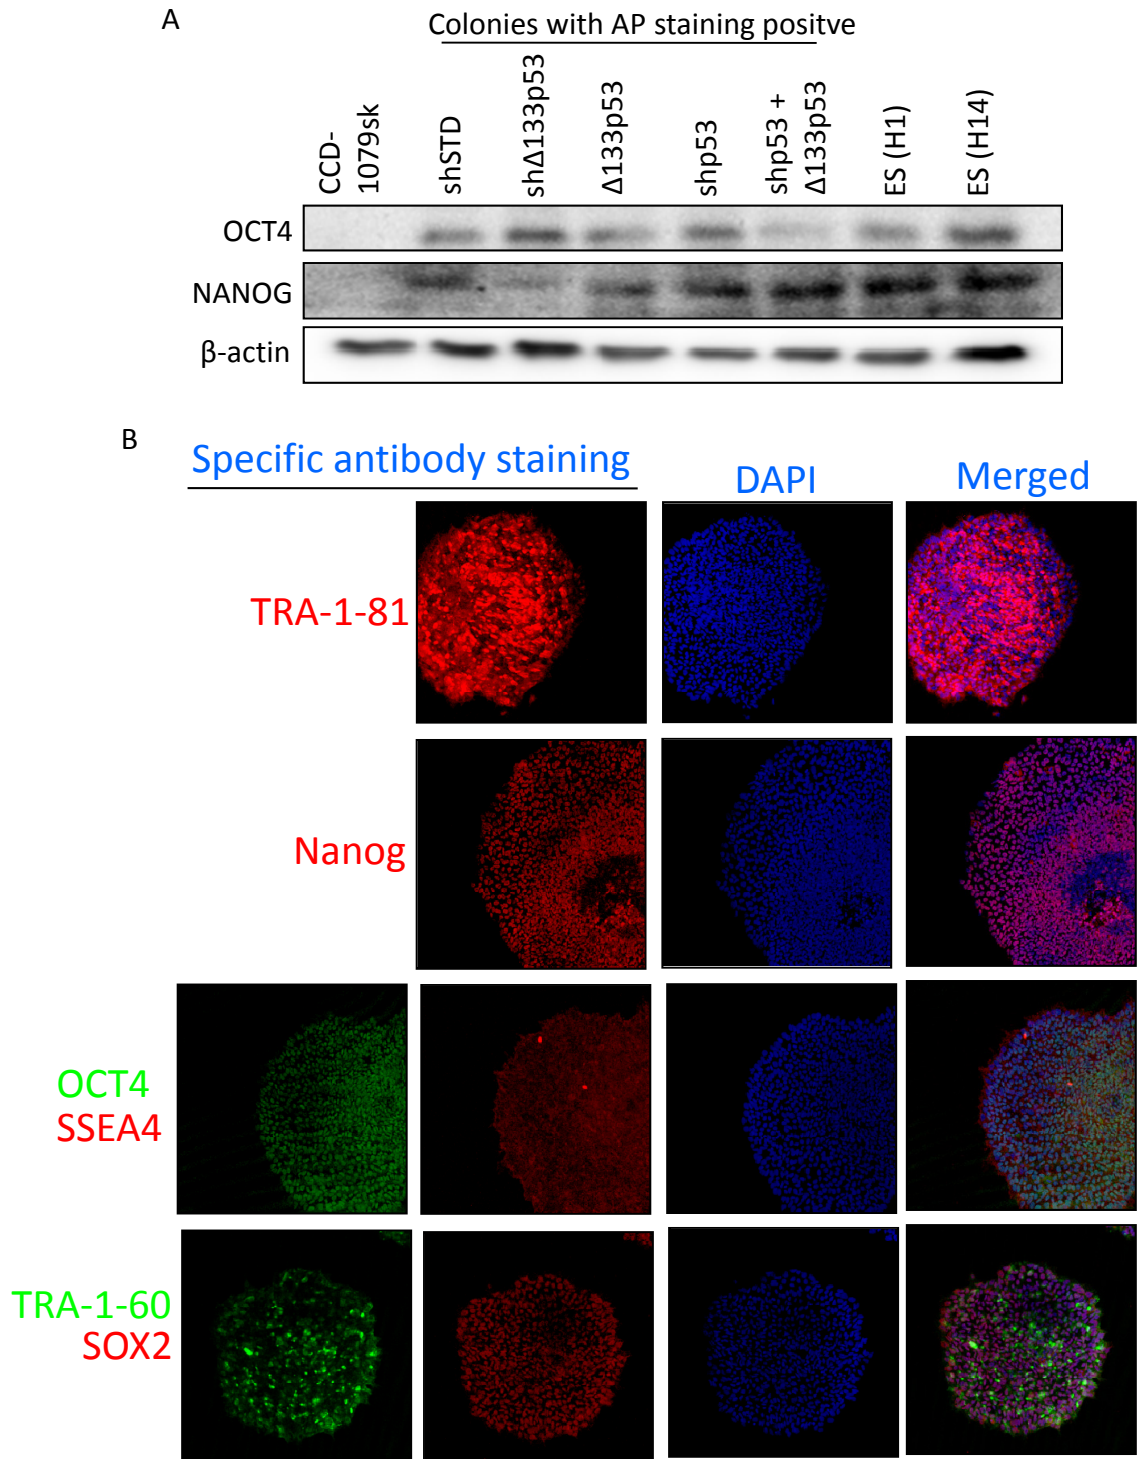

**Figure S1**

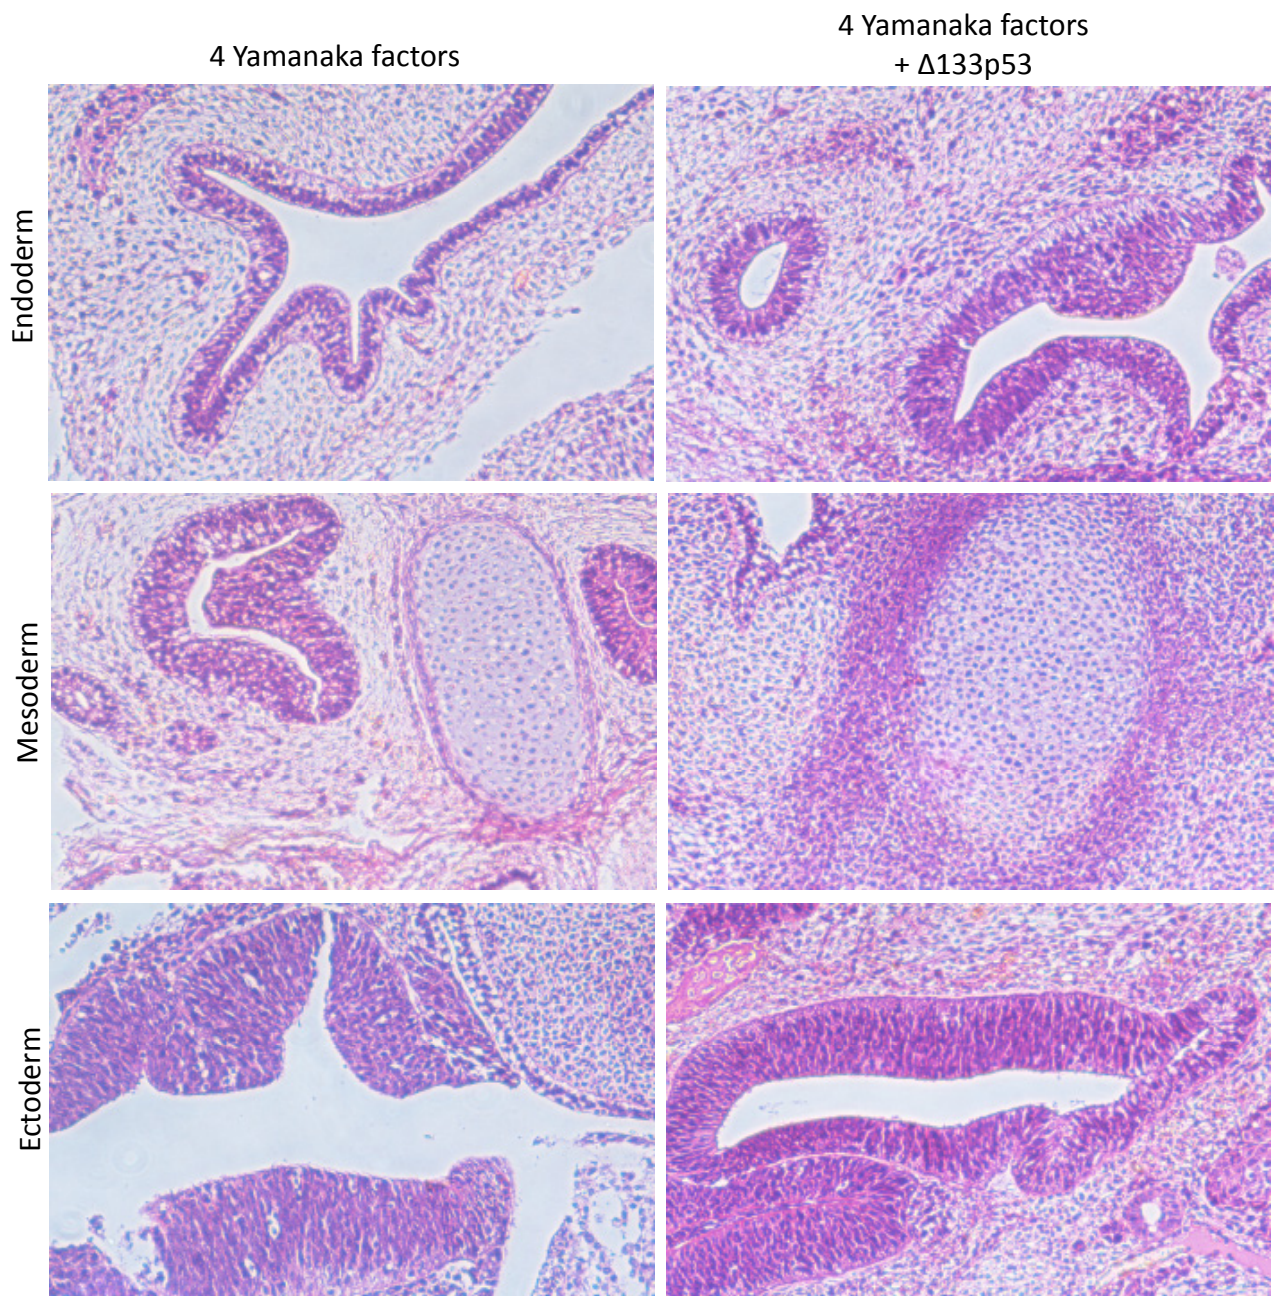

**Figure S2**

## SUPPLEMENTARY FIGURE LEGENDS

**Supplementary Figure 1** Confirmation on characteristics of iPS cell colonies used in karyotype analysis. More than 5 reprogramming cell colonies from each treatment were separately picked into a new 12-well plate for further expansion at 25-30 dpi. At passage 4, part of cells were subjected to AP staining. AP positive colonies were used for further analysis. (a) Western blot analysis of iPS cell marker genes: OCT4 (upper panel) and NANOG (middle panel) in the AP positive colonies. CCD-1079sk cells were used as the negative control. Human ES cells of lines H1 and H14 were used as the positive control. (b) Immuno-staining or co-immuno-staining of iPS cell marker genes in the AP positive colonies as indicated. 1<sup>st</sup> panel: TRA-1-81 in red; 2<sup>nd</sup> panel: Nanog in red; 3<sup>rd</sup> panel: OCT4 in green and SSEA4 in red; 4<sup>th</sup> TRA-1-60 in green and SOX2 in red. DAPI for nuclear staining in blue.

**Supplementary Figure 2** The injections of iPS cells induced by 4 Yamanaka factors or by 4 factors plus with  $\Delta 133p53$  produced correspondingly 3 teratomas each. Histological analysis of haematoxylin and eosin stained sections revealed features of (from top to bottom): endoderm (respiratory epithelial-like tissue), mesoderm (cartilage-like tissue), and ectoderm (neuroepithelial-like tissue).

### Supplementary Table S1: PCR Primers

| Primers for lentivirus constructs      |                                                                                                    |
|----------------------------------------|----------------------------------------------------------------------------------------------------|
| Hu $\Delta 133p53$ -BamH1-For          | CGCTGGATCCACCATGTTTTGCCAACTGGCCAAGA                                                                |
| Hu $\Delta 133p53$ -Nhe1-Rev           | ACGTGCTAGCTCAGTCTGAGTCAGGCCCTTCTGT                                                                 |
| Xho1-U6-For                            | CGTA CTCGAGGGTACCAAGGTCGGGCAGGA                                                                    |
| U6-BamH1-sh $\Delta 133p53$ -Sal1- Rev | TAGCGTCGACAAAACTTGTGCCCTGACTTTCAATCTC<br>TTGAATTGAAAGTCAGGGCACAAGCCCGGATCCCGGT<br>GTTTCGTCCTTCCACA |
| Oligo-of-shp53-Cloning-For             | GATCCGGGCAATGGTTCCTGAAGACCTTCAAGAGAG<br>GTCTTCAGTGAACCATTGTTTTTG                                   |
| Oligo-of-shp53-Cloning-Rev             | TCGACAAAAACAATGGTTCCTGAAGACCTTCTTGAAG<br>GGTCTTCAGTGAACCATTGCCCCG                                  |
| Oligo-of-shSTD-Cloning-For             | GATCCGGGACGTGACACGTTCCGAGAATTCAAGAGATT                                                             |

|                                               |                                                                   |
|-----------------------------------------------|-------------------------------------------------------------------|
|                                               | CTCCGAACGTGTCACGTTTTTTG                                           |
| Oligo-of-shSTD-Cloning-Rev                    | TCGACAAAAAACGTGACACGTTCCGAGAATCTCTTGA<br>ATTCTCCGAACGTGTCACGTCCCG |
| <b>Primers for qRT-PCR in human cell line</b> |                                                                   |
| Hu <i>d133p53q</i> PCR i4 For                 | TGGGTTGCAGGAGGTGCTTAC                                             |
| Hu <i>d133p53q</i> PCR i4 Rev                 | CCACTCGGATAAGATGCTGAGG                                            |
| Hu Full <i>p53q</i> PCR For                   | TGGAGGAGCCGCAGTCAGAT                                              |
| Hu Full <i>p53q</i> PCR Rev                   | GCAGGGGCCGCCGGTGTAGGAG                                            |
| Hu <i><math>\beta</math>-Actin</i> qPCR For   | TGGTGGGCATGGGTCAGAAGGAT                                           |
| Hu <i><math>\beta</math>-Actin</i> qPCR Rev   | CCAGAGGCGTACAGGGATAGCAC                                           |
